# Supplementary material for: Factors Associated With Patient Ratings of Timeliness of Primary Care Appointments
Source: PubMed Central journal article supplement (PMC7786731; doi:10.1177/2374373520968979), 2020-10-27
Supplement: Appendix_A.pdf [file Appendix_A.pdf]

## Appendix A

Multilevel logistic results for survey questions on whether patient got primary care appointments as soon as needed.

| Measure                                    | Urgent care<br>(N=98,484)<br>Always=51.6% |             | Routine care<br>(N= 203,884)<br>Always= 60.7% |             |
|--------------------------------------------|-------------------------------------------|-------------|-----------------------------------------------|-------------|
|                                            | OR                                        | 95% CI      | OR                                            | 95% CI      |
| <b>Patient factors</b>                     |                                           |             |                                               |             |
| Age: Less than 45                          | <b>.73</b>                                | .68 - .79   | <b>.77</b>                                    | .72 - .81   |
| Age: 45 to 55                              | 1.00                                      |             | 1.00                                          |             |
| Age: 55 to 64                              | <b>1.21</b>                               | 1.15 - 1.28 | <b>1.21</b>                                   | 1.16 - 1.26 |
| Age: 65 to 74                              | <b>1.39</b>                               | 1.33 - 1.46 | <b>1.39</b>                                   | 1.34 - 1.44 |
| Age: 75 to 84                              | <b>1.57</b>                               | 1.48 - 1.66 | <b>1.57</b>                                   | 1.50 - 1.63 |
| Age: 85 plus                               | <b>1.73</b>                               | 1.61 - 1.86 | <b>1.76</b>                                   | 1.67 - 1.84 |
| Female                                     | .99                                       | .94 - 1.05  | 1.03                                          | .99 - 1.07  |
| Race: African American                     | 1.00                                      |             | 1.00                                          |             |
| Race: White                                | <b>.90</b>                                | .84 - .96   | <b>.88</b>                                    | .84 - .93   |
| Race: Other                                | <b>.85</b>                                | .79 - .92   | <b>.87</b>                                    | .82 - .93   |
| Race: Not reported                         | .97                                       | .93 - 1.01  | <b>1.03</b>                                   | 1.00 - 1.07 |
| Hispanic                                   | 1.05                                      | .99 - 1.11  | 1.00                                          | .96 - 1.05  |
| Language other than English spoken at home | .99                                       | .92 - 1.06  | <b>.92</b>                                    | .87 - .97   |
| Education: high school graduate            | 1.00                                      |             | 1.00                                          |             |
| Education: some college                    | .92                                       | .89 - .95   | .94                                           | .92 - .96   |
| Education: college graduate or more        | .99                                       | .96 - 1.03  | 1.01                                          | .98 - 1.04  |
| Education: non-graduate/unknown            | 1.02                                      | .97 - 1.07  | 1.01                                          | .97 - 1.05  |
| General health (very good/excellent)       | <b>1.75</b>                               | 1.69 - 1.81 | <b>1.61</b>                                   | 1.57 - 1.65 |
| Mental health (very good/excellent)        | <b>1.46</b>                               | 1.42 - 1.51 | <b>1.50</b>                                   | 1.47 - 1.54 |
| Elixhauser group: one condition            | <b>1.03</b>                               | 1.00 - 1.06 | <b>1.11</b>                                   | 1.08 - 1.14 |
| Elixhauser group: two conditions           | <b>1.04</b>                               | 1.00 - 1.08 | <b>1.12</b>                                   | 1.09 - 1.15 |
| Elixhauser group: three or more conditions | <b>1.07</b>                               | 1.03 - 1.12 | <b>1.15</b>                                   | 1.11 - 1.18 |
| Percent patients with rural residence – Q2 | 1.06                                      | .99 - 1.14  | <b>1.08</b>                                   | 1.02 - 1.14 |
| Percent patients with rural residence – Q3 | <b>1.08</b>                               | 1.00 - 1.16 | <b>1.13</b>                                   | 1.06 - 1.20 |
| Percent patients with rural residence – Q4 | <b>1.14</b>                               | 1.05 - 1.24 | <b>1.24</b>                                   | 1.16 - 1.33 |
| <b>Provider factors</b>                    |                                           |             |                                               |             |
| Provider visits:1                          | <b>.84</b>                                | .81 - .86   | <b>1.15</b>                                   | 1.12 - 1.17 |
| Provider visits 2                          | 1.00                                      |             | 1.00                                          |             |
| Provider visits: 3 to 4                    | 1.03                                      | .99 - 1.06  | <b>.95</b>                                    | .92 - .98   |
| Provider visits: 5 or more                 | <b>1.21</b>                               | 1.15 - 1.27 | <b>1.07</b>                                   | 1.02 - 1.12 |
| Provider history: Less than 1 year         | <b>1.11</b>                               | 1.08 - 1.15 | <b>1.06</b>                                   | 1.03 - 1.08 |
| Provider history: 1-2 years                | 1.00                                      |             | 1.00                                          |             |
| Provider history: 3 to 5 years             | <b>1.08</b>                               | 1.04 - 1.13 | <b>1.06</b>                                   | 1.03 - 1.09 |
| Provider history: 5 plus years             | <b>1.28</b>                               | 1.23 - 1.33 | <b>1.23</b>                                   | 1.20 - 1.26 |
| Saw usual primary care provider            | <b>1.61</b>                               | 1.53 - 1.70 | <b>1.44</b>                                   | 1.40 - 1.49 |

## Appendix A continued

| Measure                                    | Urgent care<br>(N=98,484)<br>Always=51.6% |             | Routine care<br>(N= 203,884)<br>Always= 60.7% |             |
|--------------------------------------------|-------------------------------------------|-------------|-----------------------------------------------|-------------|
|                                            | OR                                        | 95% CI      | OR                                            | 95% CI      |
| Primary care new patient wait Q2           | <b>.91</b>                                | .85 - .98   | <b>.92</b>                                    | .87 - .97   |
| Primary care new patient wait Q3           | <b>.86</b>                                | .80 - .92   | <b>.87</b>                                    | .82 - .92   |
| Primary care new patient wait Q4           | <b>.72</b>                                | .67 - .78   | <b>.75</b>                                    | .70 - .79   |
| Primary care established patient wait Q2   | .99                                       | .92 - 1.06  | .99                                           | .93 - 1.05  |
| Primary care established patient wait Q3   | .94                                       | .87 - 1.01  | <b>.91</b>                                    | .85 - .97   |
| Primary care established patient wait Q4   | <b>.89</b>                                | .82 - .97   | <b>.85</b>                                    | .79 - .91   |
| Mental health new patient wait Q2          | 1.00                                      | .94 - 1.07  | .98                                           | .93 - 1.03  |
| Mental health new patient wait Q3          | .97                                       | .91 - 1.03  | .98                                           | .93 - 1.04  |
| Mental health new patient wait Q4          | .92                                       | .86 - 0.99  | .96                                           | .91 - 1.02  |
| Mental health established patient wait Q2  | 1.02                                      | .95 - 1.09  | .99                                           | .94 - 1.05  |
| Mental health established patient wait Q3  | 1.01                                      | .95 - 1.08  | .97                                           | .92 - 1.03  |
| Mental health established patient wait Q4  | 1.03                                      | .95 - 1.11  | .99                                           | .94 - 1.06  |
| Specialty care new patient wait Q2         | 1.03                                      | .96 - 1.11  | 1.01                                          | .95 - 1.07  |
| Specialty care new patient wait Q3         | .98                                       | .91 - 1.05  | .95                                           | .89 - 1.01  |
| Specialty care new patient wait Q4         | .99                                       | .92 - 1.07  | .96                                           | .91 - 1.02  |
| Specialty care established patient wait Q2 | .96                                       | .89 - 1.03  | .94                                           | .89 - 1.00  |
| Specialty care established patient wait Q3 | .99                                       | .92 - 1.07  | .97                                           | .91 - 1.03  |
| Specialty care established patient wait Q4 | 1.03                                      | .95 - 1.11  | 1.00                                          | .94 - 1.07  |
| Third next available Q2                    | .97                                       | .91 - 1.04  | .97                                           | .92 - 1.03  |
| Third next available Q3                    | 1.01                                      | .94 - 1.08  | 1.00                                          | .94 - 1.06  |
| Third next available Q4                    | .99                                       | .92 - 1.07  | 1.02                                          | .96 - 1.09  |
| Same day appointments Q2                   | 1.00                                      | .94 - 1.07  | 1.02                                          | .96 - 1.07  |
| Same day appointments Q3                   | <b>1.10</b>                               | 1.03 - 1.18 | <b>1.06</b>                                   | 1.00 - 1.13 |
| Same day appointments Q4                   | <b>1.13</b>                               | 1.05 - 1.23 | 1.06                                          | .99 - 1.13  |
| Community-based outpatient clinic          | .99                                       | .91 - 1.07  | 1.01                                          | .94 - 1.08  |
| Continuity primary care provider Q2        | 1.07                                      | .99 - 1.15  | <b>1.07</b>                                   | 1.01 - 1.14 |
| Continuity primary care provider Q3        | <b>1.12</b>                               | 1.03 - 1.22 | <b>1.16</b>                                   | 1.08 - 1.24 |
| Continuity primary care provider Q4        | <b>1.21</b>                               | 1.11 - 1.32 | <b>1.22</b>                                   | 1.14 - 1.31 |
| Post discharge contact within 2 days Q2    | <b>1.07</b>                               | 1.00 - 1.15 | <b>1.08</b>                                   | 1.02 - 1.14 |
| Post discharge contact within 2 days Q3    | 1.04                                      | .97 - 1.11  | <b>1.06</b>                                   | 1.00 - 1.13 |
| Post discharge contact within 2 days Q4    | <b>1.10</b>                               | 1.02 - 1.18 | <b>1.10</b>                                   | 1.04 - 1.17 |
| Emergency department use Q2                | .94                                       | .87 - 1.03  | .98                                           | .92 - 1.05  |
| Emergency department use Q3                | 1.01                                      | .92 - 1.10  | 1.01                                          | .94 - 1.09  |
| Emergency department use Q4                | <b>1.09</b>                               | .99 - 1.20  | <b>1.12</b>                                   | 1.03 - 1.21 |
| Non-traditional encounters Q2              | 1.01                                      | .94 - 1.08  | 1.02                                          | .96 - 1.07  |
| Non-traditional encounters Q3              | 1.02                                      | .95 - 1.09  | 1.02                                          | .96 - 1.08  |
| Non-traditional encounters Q4              | <b>1.07</b>                               | 1.00 - 1.16 | <b>1.08</b>                                   | 1.02 - 1.15 |

Appendix A Continued

| Measure                           | Urgent care<br>(N=98,484)<br>Always=51.6% |            | Routine care<br>(N= 203,884)<br>Always= 60.7% |            |
|-----------------------------------|-------------------------------------------|------------|-----------------------------------------------|------------|
|                                   | OR                                        | 95% CI     | OR                                            | 95% CI     |
| Support staff ratio Q2            | 1.05                                      | .98 - 1.12 | 1.01                                          | .96 - 1.07 |
| Support staff ratio Q3            | 1.02                                      | .95 - 1.09 | .98                                           | .93 - 1.04 |
| Support staff ratio Q4            | 1.05                                      | .98 - 1.12 | 1.03                                          | .97 - 1.08 |
| Panel size (observed/expected) Q2 | .99                                       | .93 - 1.05 | 1.01                                          | .95 - 1.06 |
| Panel size (observed/expected) Q3 | .95                                       | .89 - 1.02 | .96                                           | .91 - 1.01 |
| Panel size (observed/expected) Q4 | .93                                       | .86 - 1.00 | .95                                           | .90 - 1.01 |
| Complexity group: Moderate        | 1.00                                      | .89 - 1.11 | .94                                           | .86 - 1.03 |
| Complexity group: Highest         | 1.02                                      | .92 - 1.13 | .99                                           | .91 - 1.08 |
| VISN 1                            | <b>1.00</b>                               |            | <b>1.00</b>                                   |            |
| VISN 2                            | <b>.80</b>                                | .69 - .92  | <b>.79</b>                                    | .71 - .89  |
| VISN 4                            | <b>.84</b>                                | .72 - .98  | <b>.88</b>                                    | .78 - .99  |
| VISN 5                            | <b>.67</b>                                | .57 - .79  | <b>.63</b>                                    | .55 - .72  |
| VISN 6                            | <b>.57</b>                                | .48 - .67  | <b>.54</b>                                    | .47 - .62  |
| VISN 7                            | <b>.56</b>                                | .48 - .65  | <b>.57</b>                                    | .50 - .65  |
| VISN 8                            | <b>.58</b>                                | .50 - .67  | <b>.60</b>                                    | .54 - .68  |
| VISN 9                            | <b>.61</b>                                | .52 - .72  | <b>.60</b>                                    | .53 - .68  |
| VISN 10                           | <b>.61</b>                                | .53 - .71  | <b>.63</b>                                    | .56 - .71  |
| VISN 12                           | <b>.67</b>                                | .57 - .78  | <b>.72</b>                                    | .63 - .81  |
| VISN 15                           | <b>.64</b>                                | .55 - .75  | <b>.72</b>                                    | .64 - .82  |
| VISN 16                           | <b>.61</b>                                | .52 - .70  | <b>.59</b>                                    | .52 - .66  |
| VISN 17                           | <b>.53</b>                                | .46 - .62  | <b>.54</b>                                    | .47 - .61  |
| VISN 18                           | <b>.49</b>                                | .41 - .57  | <b>.47</b>                                    | .41 - .54  |
| VISN 19                           | <b>.55</b>                                | .48 - .64  | <b>.55</b>                                    | .49 - .62  |
| VISN 20                           | <b>.50</b>                                | .42 - .59  | <b>.52</b>                                    | .45 - .60  |
| VISN 21                           | <b>.62</b>                                | .54 - .71  | <b>.59</b>                                    | .53 - .67  |
| VISN 22                           | <b>.54</b>                                | .45 - .64  | <b>.54</b>                                    | .47 - .62  |
| VISN 23                           | <b>.86</b>                                | .74 - 1.00 | <b>.79</b>                                    | .70 - .89  |

Note: Bold font indicates p<.05. Q represents “quartile” where Q4 is upper quartile
